# Supplementary material for: Functionalized β-Cyclodextrin Immobilized on Ag-Embedded Silica Nanoparticles as a Drug Carrier
Source: PubMed Central journal article supplement (PMC6359520; doi:10.3390/ijms20020315), 2019-01-14
Supplement: ijms-20-00315-s001.pdf [file ijms-20-00315-s001.pdf]

## Supplementary Materials

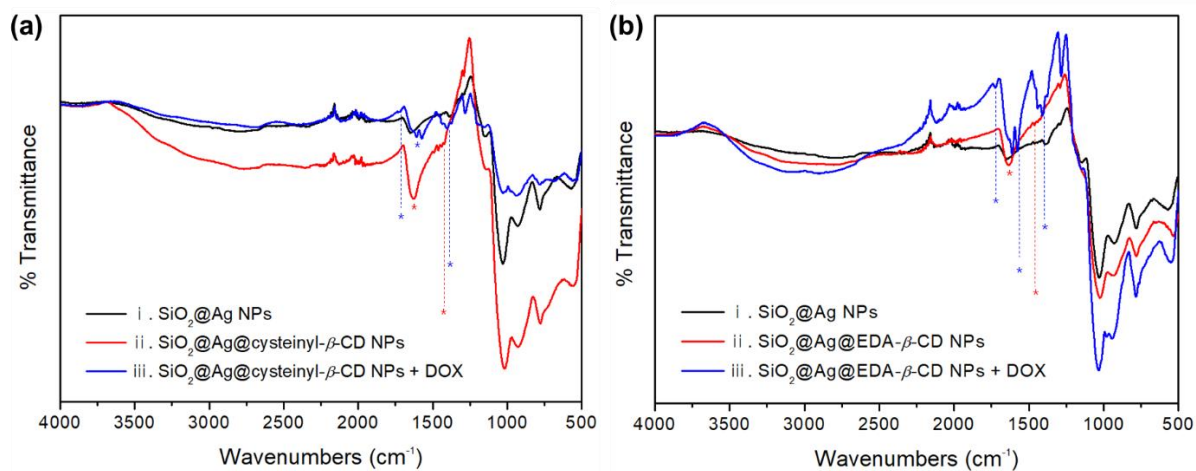

**Figure S1.** Broad-range FTIR spectra (from 4000 to 500 cm<sup>-1</sup>) confirming the introduction of cysteinyll-β-CD, EDA-β-CD, and DOX on modified SiO<sub>2</sub>@Ag NPs. FTIR spectra of i) SiO<sub>2</sub>@Ag NPs, ii) SiO<sub>2</sub>@Ag@cysteinyll-β-CD NPs and iii) SiO<sub>2</sub>@Ag@cysteinyll-β-CD NPs (a) before and (b) after the introduction of DOX. Normalized by the signal of the material at ~3800 cm<sup>-1</sup>.

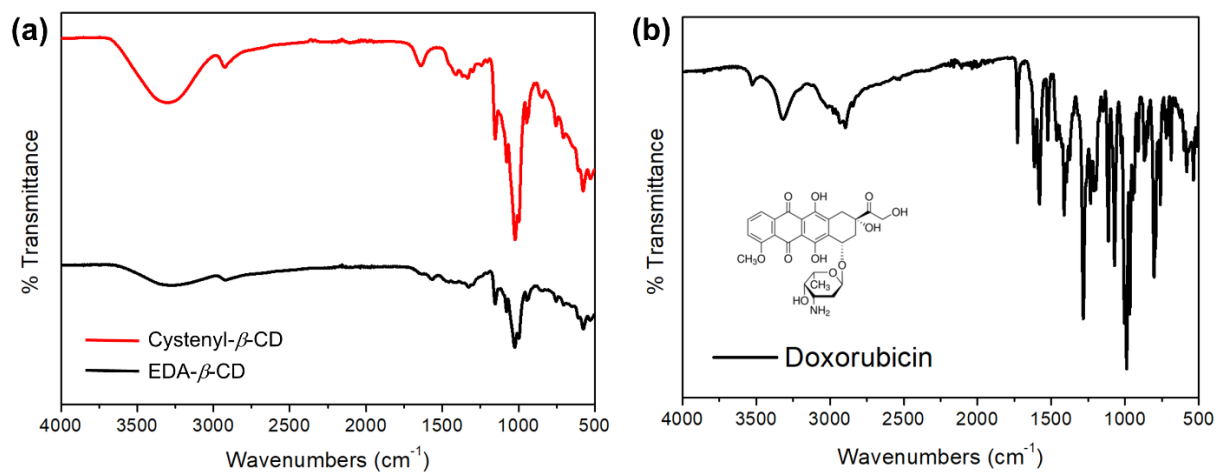

**Figure S2.** FTIR spectrum of (a) cysteinyl-β-CD and EDA-β-CD, (b) DOX. (Inset: The chemical structure of DOX).

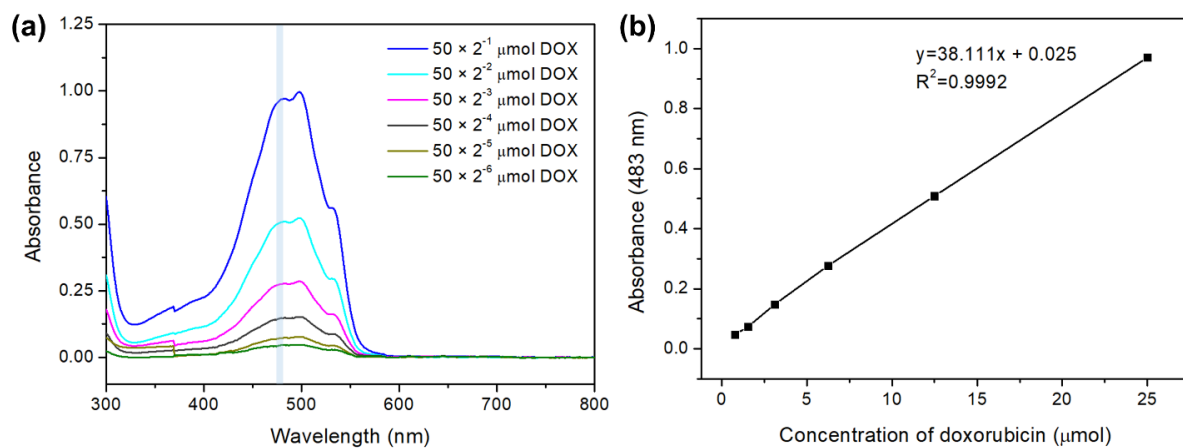

**Figure S3.** (a) UV-Vis spectra of doxorubicin (DOX). The wavelength of 483 nm was marked with vertical line inside of the graph. (b) Calibration curve of DOX aqueous solution as a function of concentration.
